# Supplementary material for: A graphene-interlayered magnetic composite as a multifunctional SERS substrate
Source: Royal Society of Chemistry journal article supplement (doi:10.1039/c5ra09738j), 2015-01-01
Supplement: c5ra09738j1.pdf [file c5ra09738j1.pdf]

## Supplementary Information for

### Graphene-interlayered magnetic composite as a multifunctional SERS substrate

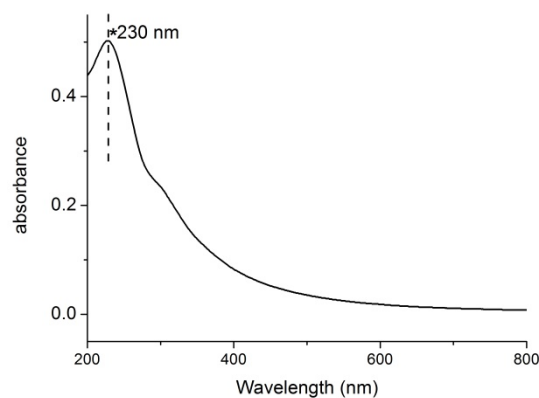

**Figure. S1** UV-vis of GO nanosheets solution

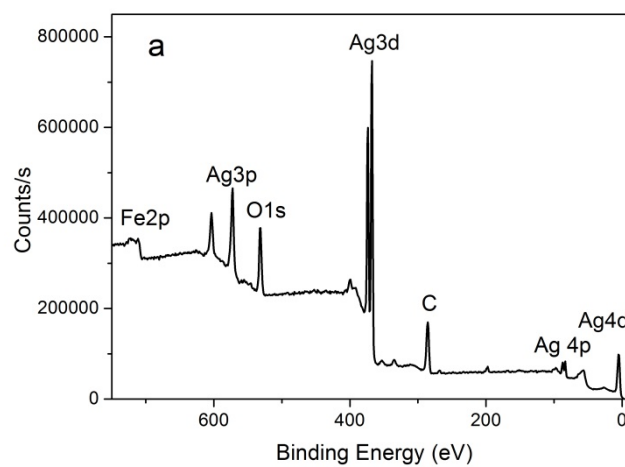

**Figure. S2 (a).** XPS survey spectrum of  $\text{Fe}_3\text{O}_4@\text{Ag-GO}$

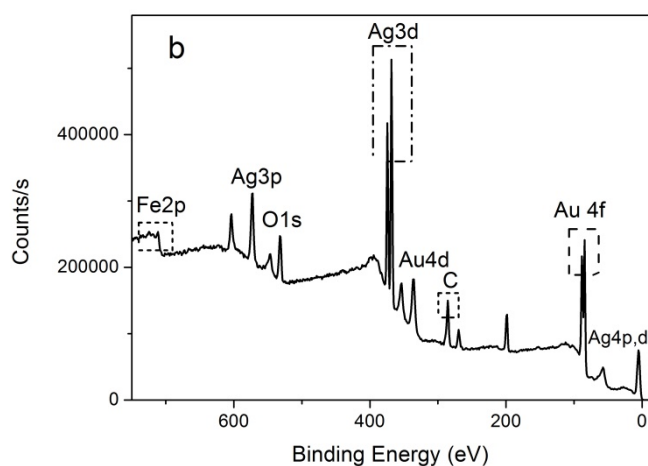

**Figure. S2 (b).** XPS survey spectrum of  $\text{Fe}_3\text{O}_4@\text{Ag-rGO-Au}$ . Elements labeled with dash rectangle were analysed in detail in the body.

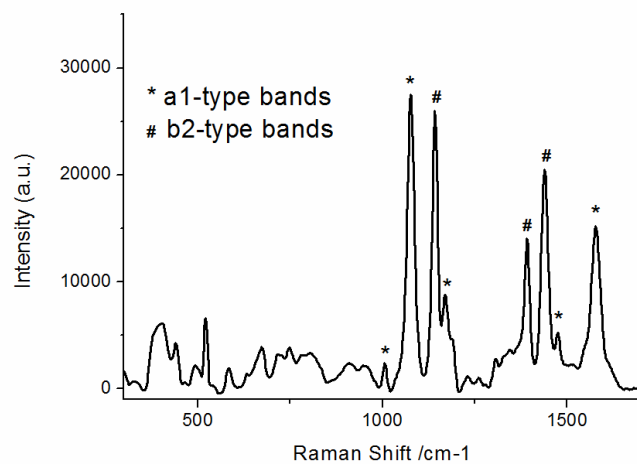

**Figure. S3** SERS spectrum of PATP at a wavelength of 782 nm

| Normal Raman | SERS Signal      | assignments                                   |
|--------------|------------------|-----------------------------------------------|
|              | <b>In 785 nm</b> |                                               |
| 391          | --               | $\delta\text{CS},(a_1)$                       |
| 463          | --               | $\gamma\text{CCC},7a(a_1)$                    |
| 634          | --               | $\gamma\text{CCC},12(a_1)$                    |
| 1004         | 1005             | $\delta\text{CC} + \gamma\text{CCC},18a(a_1)$ |
| 1076         | 1076             | $\nu\text{CS},7a(a_1)$                        |
| 1140         | 1142             | $\delta\text{CH},9b(b_2)$                     |
| 1172         | 1172             | $\delta\text{CH},9a(a_1)$                     |
|              | 1392             | $\nu\text{CS}_+ \delta\text{CH},14b(b_2)$     |
|              | 1439             | $\nu\text{CS}_+ \delta\text{CH},(3b_2)$       |
| 1482         | 1475             | $\nu\text{CS}_+ \delta\text{CH},19a(a_1)$     |

**Table S1.** Raman peaks of PATP and according assignments**EF calculation:**

The SERS enhancement factors (EF) for PATP can be calculated according to the equation  $EF = (I_{SERS}/I_{bulk})(N_{bulk}/N_{SERS})$ , where  $I_{bulk}$  is the intensity of Raman signal as calculated from the target peak area and  $N_{bulk}$  is the number of molecules in the focal volume, whereas  $I_{SERS}$  and  $N_{SERS}$  are parameters when  $Fe_3O_4@Ag-rGO-Au$  microspheres are used as active substrates. For valuable determination of  $N_{bulk}$  and  $N_{SERS}$ , 20 ul melted PATP sample and the PATP-absorbed  $Fe_3O_4@Ag-rGO-Au$  microspheres (separated from PATP solution  $10^{-7}$  M, 2 ml) were uniformly spread on 300 nm  $SiO_2/Si$  substrates.

In detail, The solid sample of PATP was slowly heated to 42 °C and then the melted PATP (20 ul) was dropped on 0.4 cm×0.4cm  $SiO_2/Si$  substrate, formed a uniform film (~800 um). After totally cooled down, the SERS detection was conducted and the peak intensity of acquired Raman signal was  $I_{bulk}$ . The penetration

depth of laser (h) is calculated by equation:  $h = \int_{-\infty}^{\infty} I(z)dz/I_{max}$ ,  $I(z)$  is the intensity of the Raman peak of Si ( $520\text{ cm}^{-1}$ ), which is measured as a reference to calculate h. As displayed in Fig. S4c, it is a function of the distance (z) deviated from the focused center. According to the equation, the penetration depth of laser (h) is measured as 460 μm. Therefore,  $N_{bulk} = \pi(d/2)^2h\rho_0N_A/M_0 = 5.12 \times 10^{14}$ .  $\rho_0$  (1.18 g/mL) and  $M_0$  (125.19 g/mol) is the density and molar mass of melted PATP, respectively.

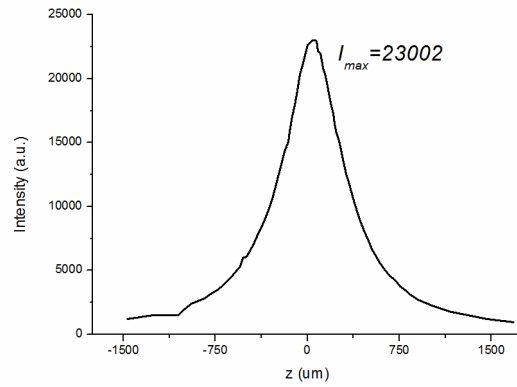

**Figure. S4** Intensity of the Raman peak of Si ( $520\text{ cm}^{-1}$ )  $I(z)$ , a function of the distance ( $z$ ) deviated from the focused center.

The number of PATP molecules contribute to the SERS signals within the laser spot area is  $N_{\text{SERS}} = RA/\sigma$ , under the assumption that molecules were absorbed on the microspheres in single layer uniformly.  $R$  is the roughness factor of the nanostructure, which approximate to be 1.  $\sigma$  is the occupied surface area of a single molecule, which is equal to  $0.22\text{ nm}^2$  for PATP.  $A$  is the area of laser spot,  $A = \pi(d/2)^2$ . Therefore,  $N_{\text{SERS}} = \pi(d/2)^2/\sigma$ . The diameter of spot size  $d$  is  $105\mu\text{m}$ . Finally, the  $N_{\text{bulk}}/N_{\text{SERS}} = h\rho_0\sigma N_A/M_0$ , and is calculated equal to  $5.61 \times 10^5$ .

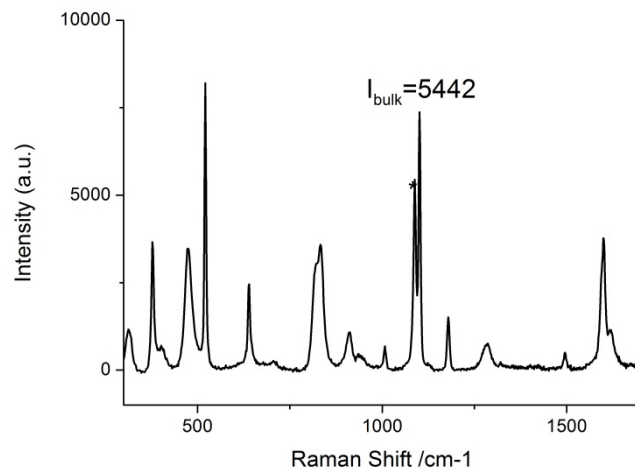

**Figure. S5 (a)** Raman spectrum of pure PATP

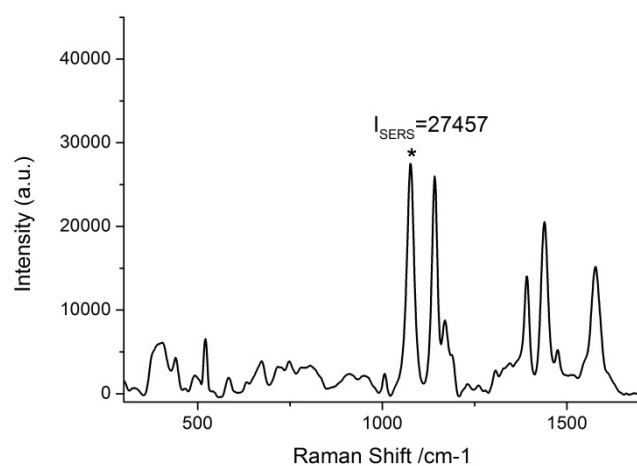

**Figure. 5 (b)** SERS spectrum of PATP with a concentration of  $10^{-7}\text{M}$

The  $I_{\text{SERS}}/I_{\text{bulk}}$  was  $27457/5442=5.04$  for peaks at  $1077\text{ cm}^{-1}$ , reading from the spectra presented in Fig. S5 a and b. Accordingly, the EF value of peaks at  $1077\text{ cm}^{-1}$  is calculated to be about  $2.83 \times 10^6$ .
